# Supplementary material for: Sesquiterpene Lactones with Dual Inhibitory Activity against the Trypanosoma brucei Pteridine Reductase 1 and Dihydrofolate Reductase
Source: MDPI journal article supplement (doi:10.3390/molecules27010149), 2021-12-27
Supplement: s1 [file s1]

Supplementary Materials

# Sesquiterpene Lactones with Dual Inhibitory Activity against the *Trypanosoma brucei* Pteridine Reductase 1 and Dihydrofolate Reductase

Katharina Possart <sup>1</sup>, Fabian C. Herrmann <sup>1</sup>, Joachim Jose <sup>2</sup>, Maria P. Costi <sup>3</sup> and Thomas J. Schmidt <sup>1,\*</sup>

<sup>1</sup> Institute of Pharmaceutical Biology and Phytochemistry (IPBP), University of Muenster, PharmaCampus, Corrensstrasse 48, D-48149 Muenster, Germany; k\_poss01@uni-muenster.de (K.P.); f\_herr01@uni-muenster.de (F.C.H.)

<sup>2</sup> Institute of Pharmaceutical and Medicinal Chemistry, University of Muenster, PharmaCampus, Corrensstrasse 48, D-48149 Muenster, Germany; joachim.jose@uni-muenster.de

<sup>3</sup> Department of Life Sciences, University of Modena and Reggio Emilia, Via G. Campi 103, 41125 Modena, Italy; mariapaola.costi@unimore.it

\* Correspondence: thomschm@uni-muenster.de; Tel.: +49-251-83-33378

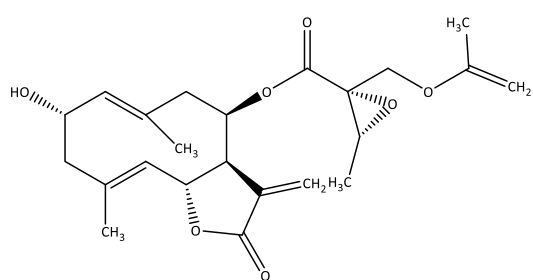**11**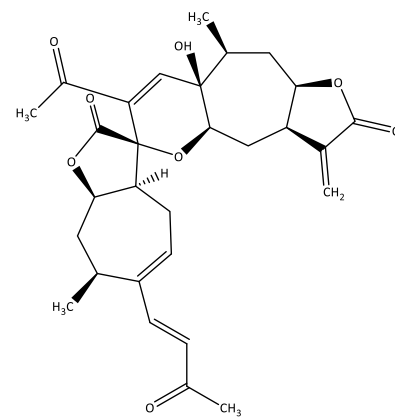**12**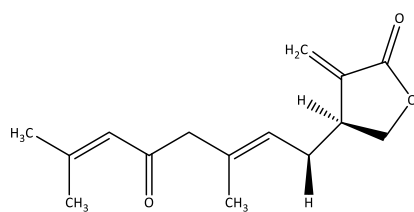**13**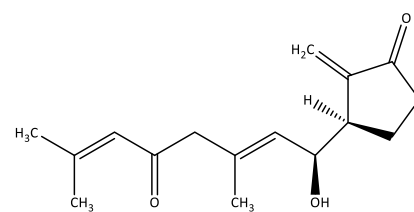**14**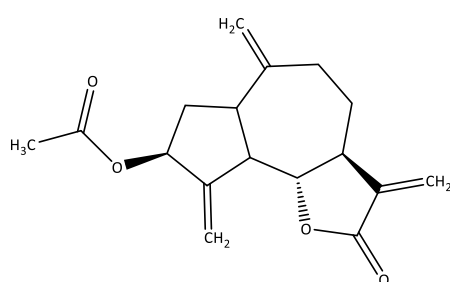**15**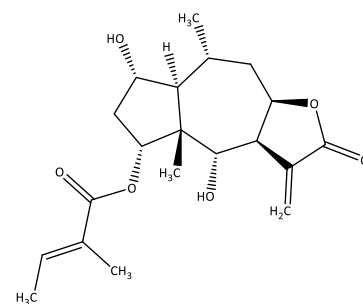**16**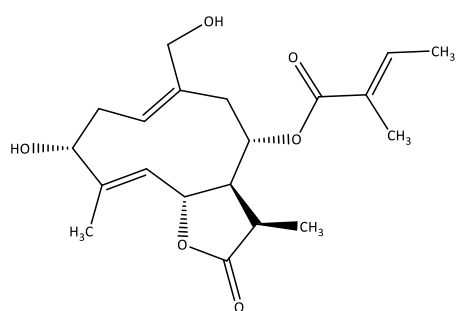**17**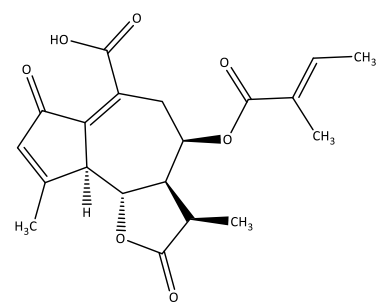**18**

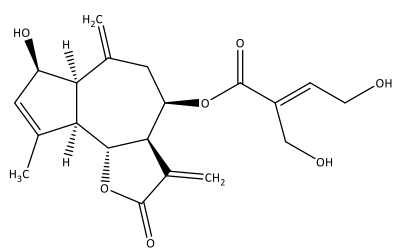

19

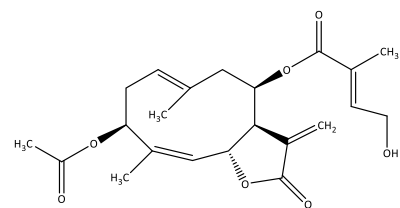

20

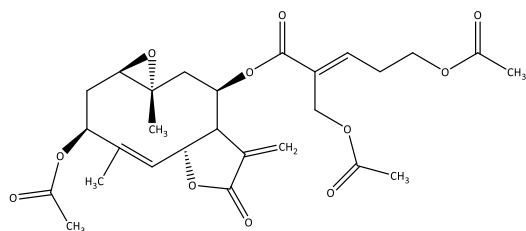

21

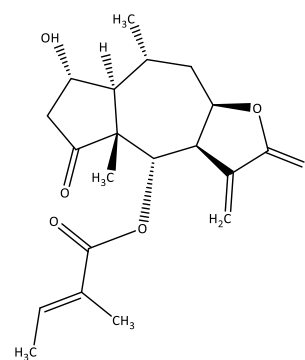

22

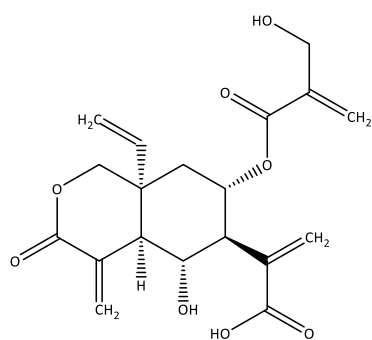

23

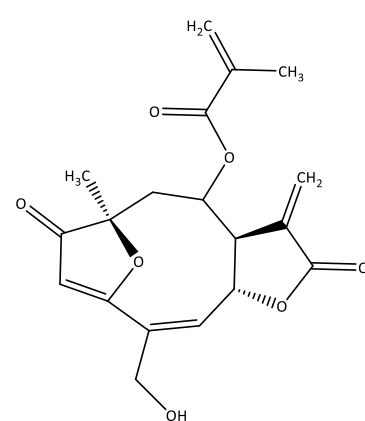

24

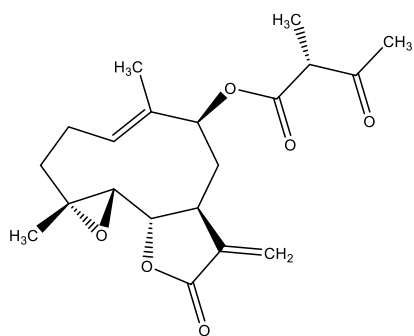

25

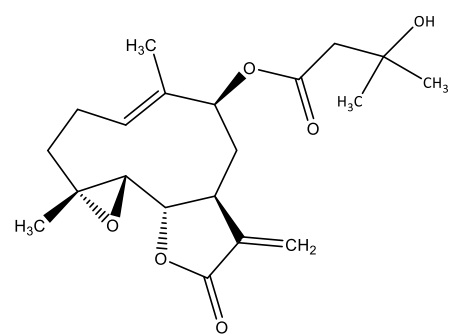

26

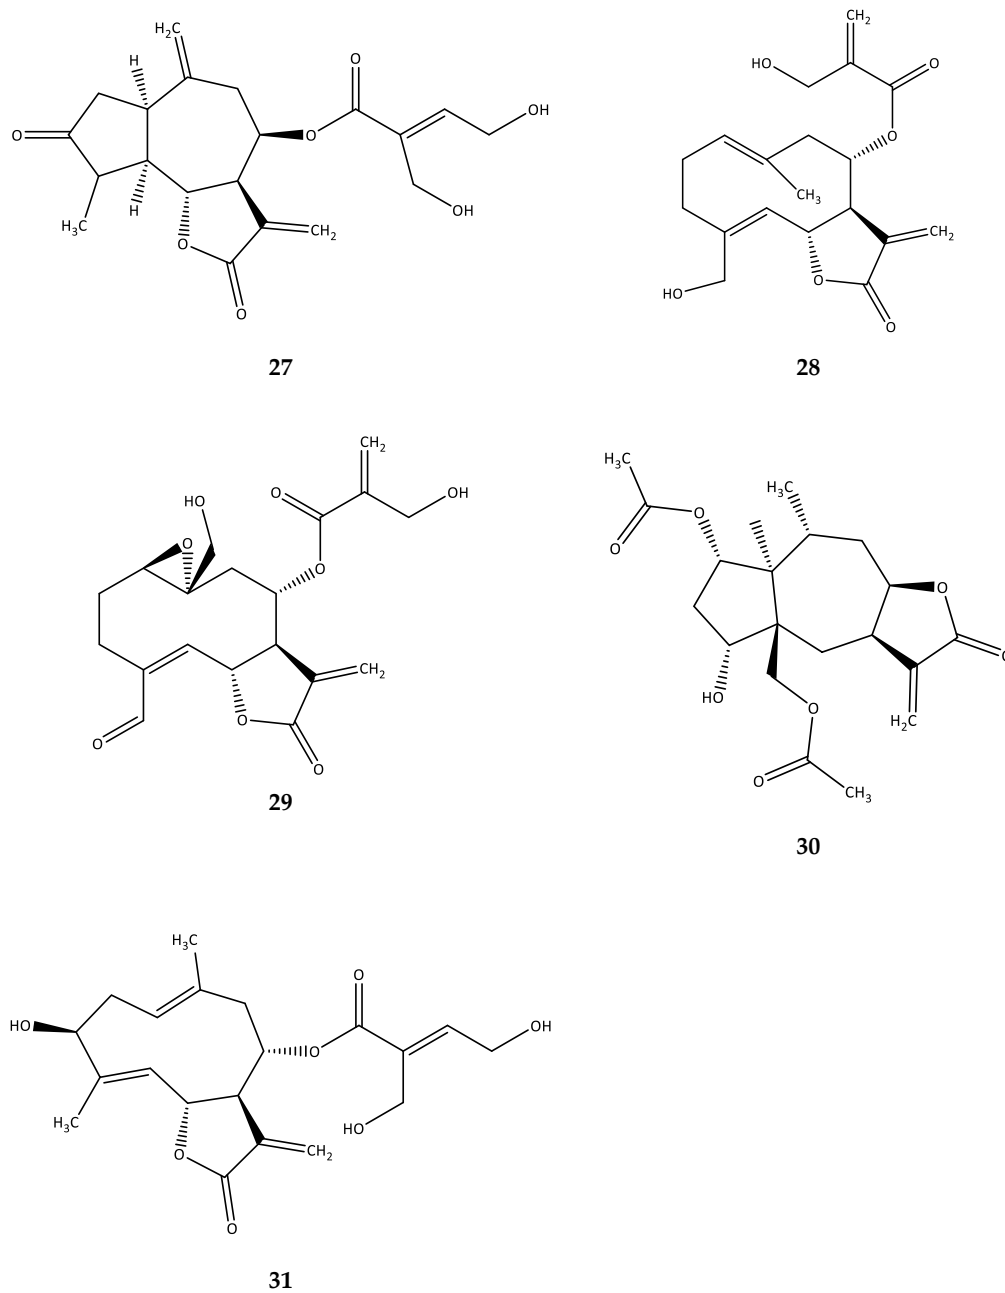

**Figure S1.** Molecular structures of further sesquiterpene lactones identified as *in silico* hits during the pharmacophore-based *in silico* screening but not tested.

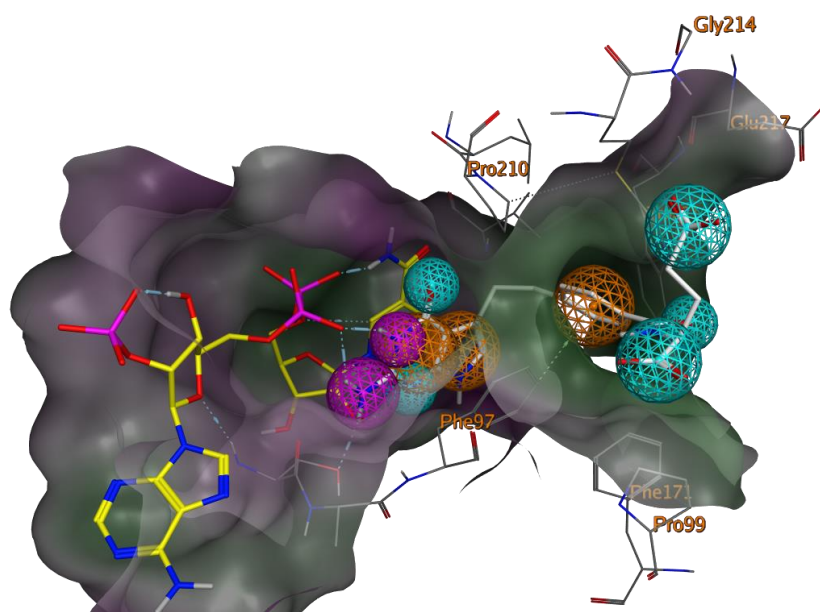

**Figure S2.** Complex-based pharmacophore hypothesis based on the *TbPTR1* binding pocket (ID: „2X9G“). Carbon atoms of the co-crystallized co-substrate NADP in yellow, carbon atoms of the co-crystallized inhibitor pemetrexed in white. The molecular surface is coloured according to lipophilicity with lipophilic areas in green and hydrophilic areas in purple. Potential interactions of the inhibitor are represented by feature spheres: H-bond donors in purple, H-bond acceptors in cyan, aromatic centers in orange. Exclusion spheres are not depicted.

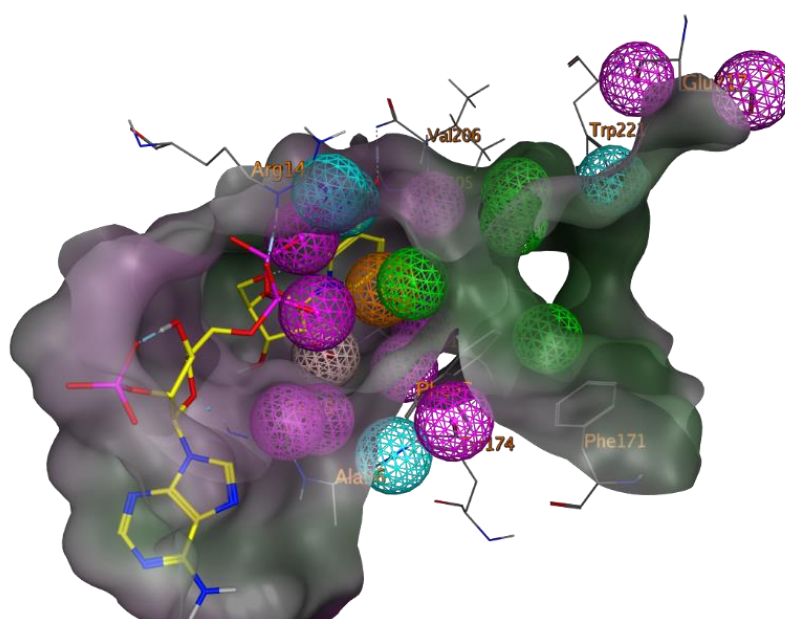

**Figure S3.** Target-based pharmacophore hypothesis based on the *TbPTR1* binding pocket (ID: „2X9G“). Carbon atoms of the co-crystallized co-substrate NADP in yellow, the molecular surface is coloured according to lipophilicity with lipophilic areas in green and hydrophilic areas in purple. Potential interactions of amino acids with an inhibitor are represented by projecting feature spheres: H-bond donors in purple, H-bond acceptors in cyan, ionic interactions in beige, aromatic centers in orange, hydrophobic structures in green. Exclusion spheres are not depicted.

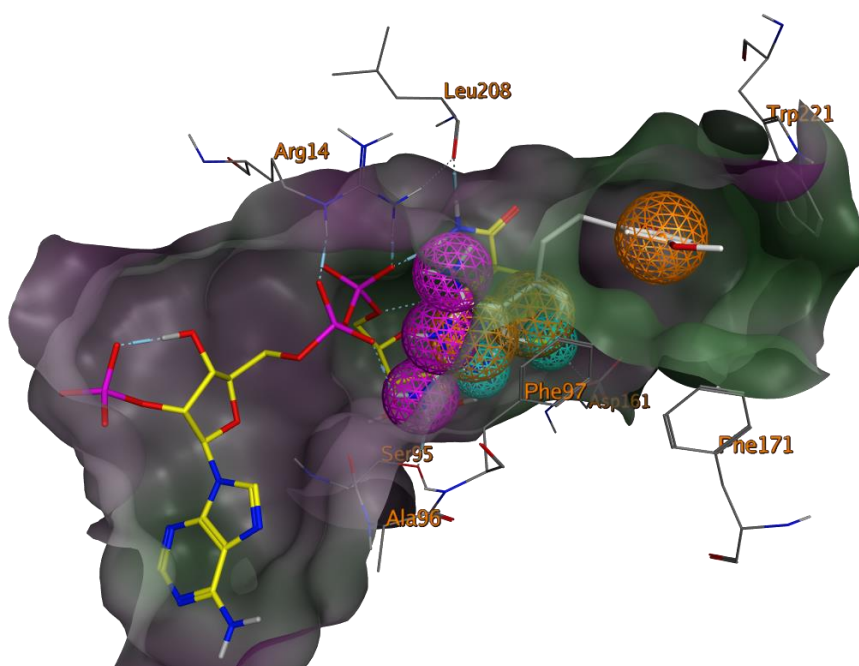

**Figure S4. Complex-based pharmacophore hypothesis based on the *TbPTR1* binding pocket (ID: „3MCV“).** Carbon atoms of the co-crystallized co-substrate NADP in yellow, carbon atoms of the co-crystallized inhibitor PY848 in white. The molecular surface is coloured according to lipophilicity with lipophilic areas in green and hydrophilic areas in purple. Potential interactions of the inhibitor are represented by feature spheres: H-bond donors in purple, H-bond acceptors in cyan, aromatic centers in orange. Exclusion spheres are not depicted.

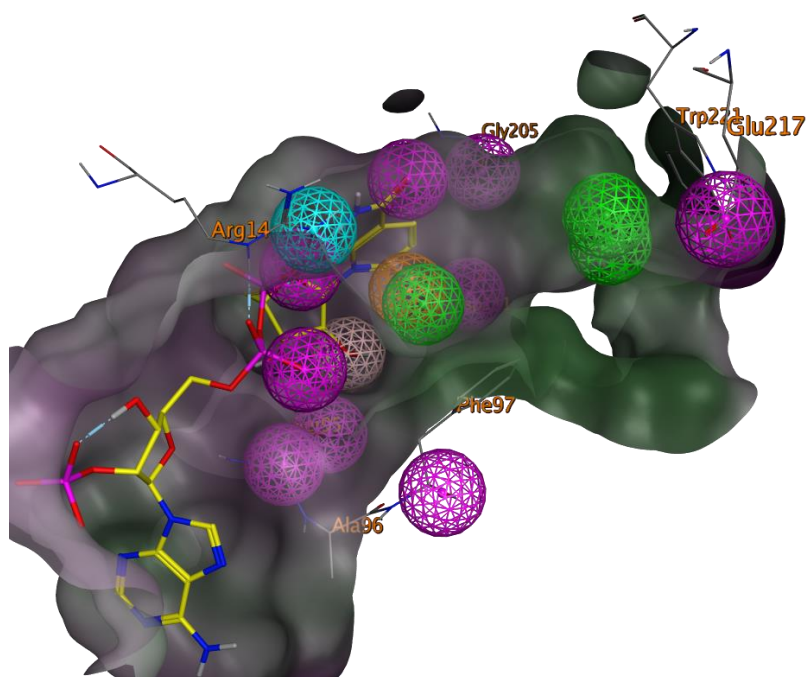

**Figure S5. Target-based pharmacophore hypothesis based on the *TbPTR1* binding pocket (ID: „3MCV“).** Carbon atoms of the co-crystallized co-substrate NADP in yellow, the molecular surface is coloured according to lipophilicity with lipophilic areas in green and hydrophilic areas in purple. Potential interactions of amino acids with an inhibitor are represented by projecting feature spheres: H-bond donors in purple, H-bond acceptors in cyan, ionic interactions in beige, aromatic centers in orange, hydrophobic structures in green. Exclusion spheres are not depicted.

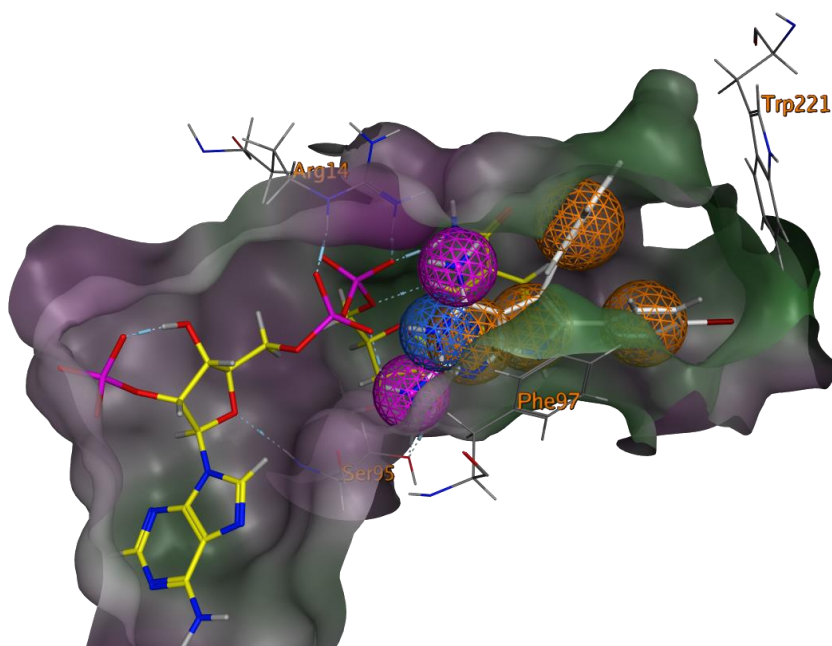

**Figure S6. Complex-based pharmacophore hypothesis based on the *TbPTR1* binding pocket (ID: „4CMJ“).** Carbon atoms of the co-crystallized co-substrate NADP in yellow, carbon atoms of the co-crystallized inhibitor 6 (4 bromophenyl) 5 phenyl 7H-pyrrolo[2,3 d]pyrimidine-2,4-diamine in white. The molecular surface is coloured according to lipophilicity with lipophilic areas in green and hydrophilic areas in purple. Potential interactions of the inhibitor are represented by feature spheres: H-bond donors in purple, cationic interactions in blue, aromatic centres in orange. Exclusion spheres are not depicted.

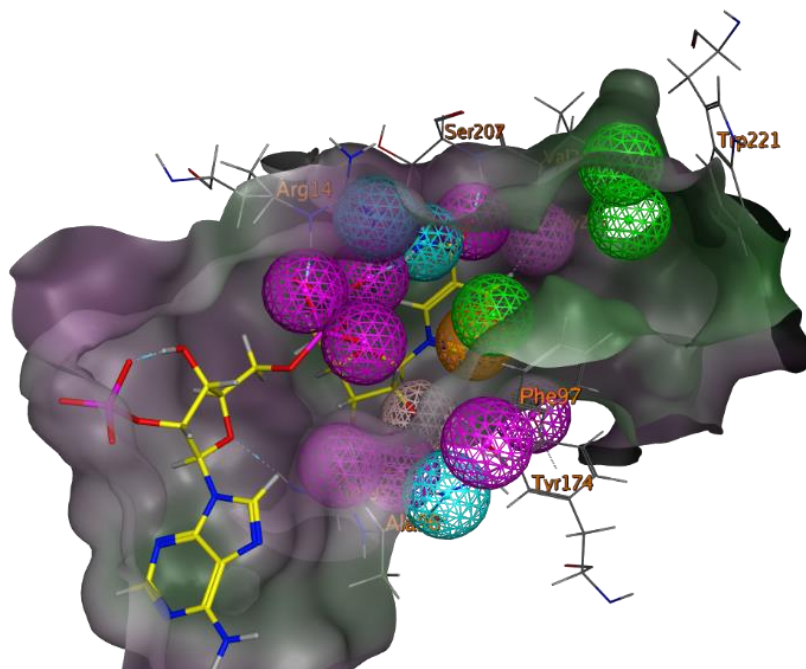

**Figure S7. Target-based pharmacophore hypothesis based on the *TbPTR1* binding pocket (ID: „4CMJ“).** Carbon atoms of the co-crystallized co-substrate NADP in yellow, the molecular surface is coloured according to lipophilicity with lipophilic areas in green and hydrophilic areas in purple. Potential interactions of amino acids with an inhibitor are represented by projecting feature spheres: H-bond donors in purple, H-bond acceptors in cyan, ionic interactions in beige, aromatic centres in orange, hydrophobic structures in green. Exclusion spheres are not depicted.

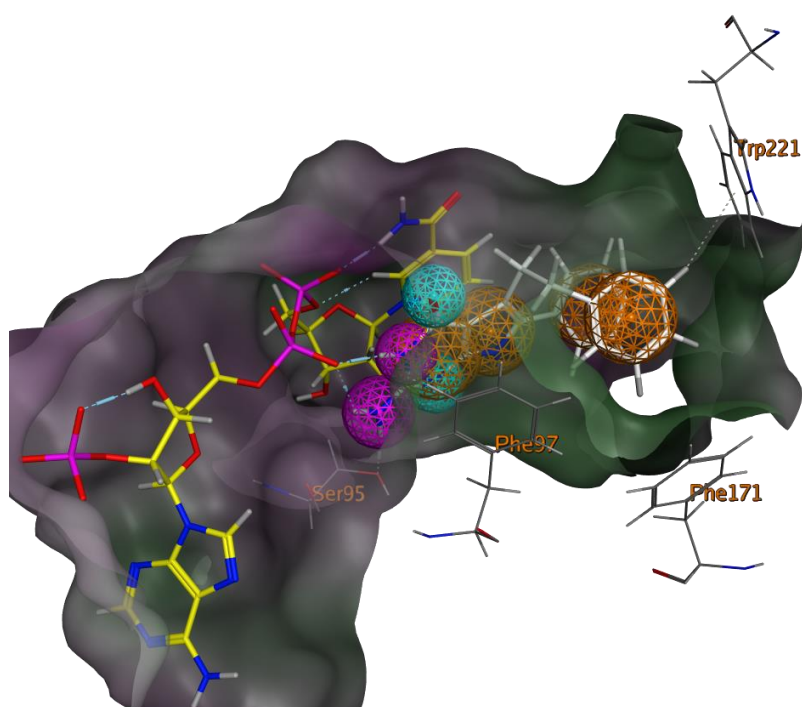

**Figure S8. Complex-based pharmacophore hypothesis based on the *TbPTR1* binding pocket (ID: „4CMK“).** Carbon atoms of the co-crystallized co-substrate NADP in yellow, carbon atoms of the co-crystallized inhibitor 2-amino-5-phenethyl-6-phenyl-3H-pyrrolo[2,3-d]pyrimidine-4(7H)-one in white. The molecular surface is coloured according to lipophilicity with lipophilic areas in green and hydrophilic areas in purple. Potential interactions of the inhibitor are represented by feature spheres: H-bond donors in purple, H-bond acceptors in cyan, aromatic centres in orange. Exclusion spheres are not depicted.

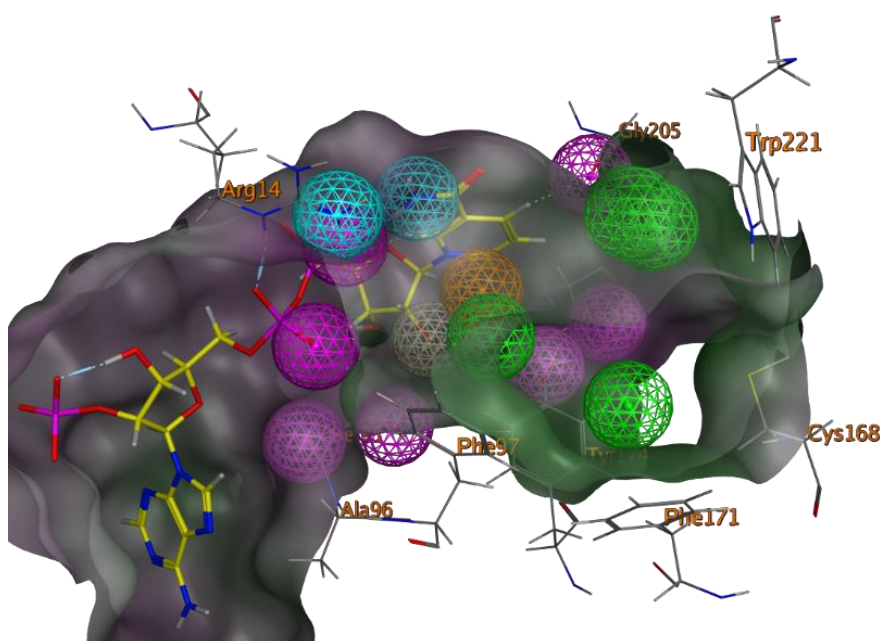

**Figure S9. Target-based pharmacophore hypothesis based on the *TbPTR1* binding pocket (ID: „4CMK“).** Carbon atoms of the co-crystallized co-substrate NADP in yellow, the molecular surface is coloured according to lipophilicity with lipophilic areas in green and hydrophilic areas in purple. Potential interactions of amino acids with an inhibitor are represented by projecting feature spheres: H-bond donors in purple, H-bond acceptors in cyan, ionic interactions in beige, aromatic centres in orange, hydrophobic structures in green. Exclusion spheres are not depicted.

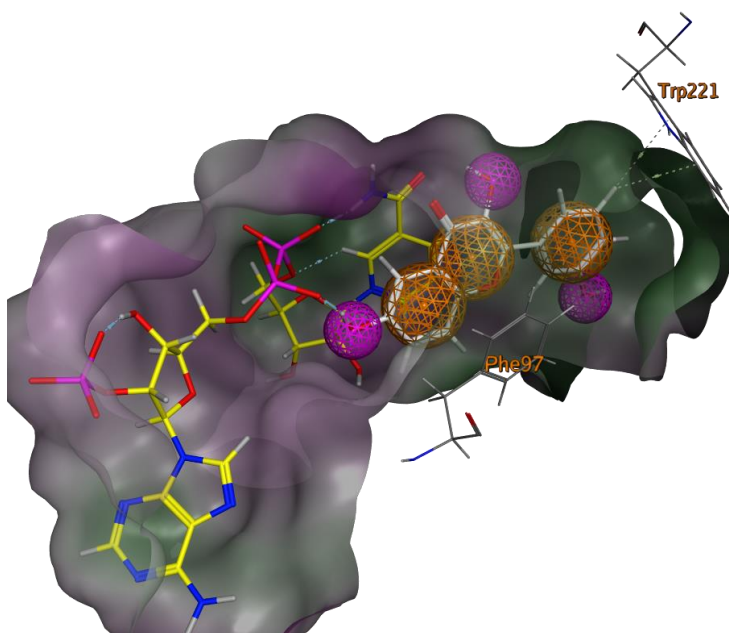

**Figure S10. Complex-based pharmacophore hypothesis based on the *TbPTR1* binding pocket (ID: „5JDI“).** Carbon atoms of the co-crystallized co-substrate NADP in yellow, carbon atoms of the co-crystallized inhibitor 3,6-dihydroxyl-2-(3-hydroxyphenyl)-4H-1-benzopyrane-4-one in white. The molecular surface is coloured according to lipophilicity with lipophilic areas in green and hydrophilic areas in purple. Potential interactions of the inhibitor are represented by feature spheres: H-bond donors in purple, aromatic centres in orange. Exclusion spheres are not depicted.

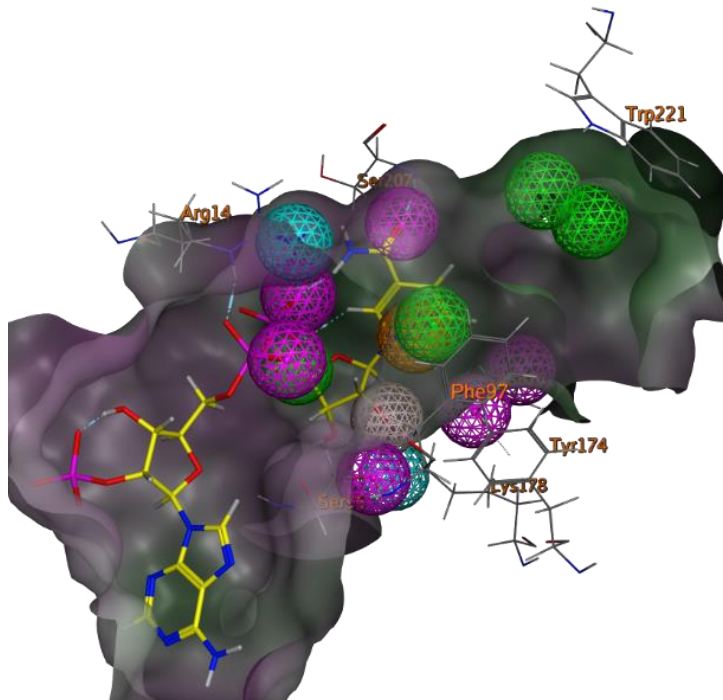

**Figure S11. Target-based pharmacophore hypothesis based on the *TbPTR1* binding pocket (ID: „5JDI“).** Carbon atoms of the co-crystallized co-substrate NADP in yellow, the molecular surface is coloured according to lipophilicity with lipophilic areas in green and hydrophilic areas in purple. Potential interactions of amino acids with an inhibitor are represented by projecting feature spheres: H-bond donors in purple, H-bond acceptors in cyan, ionic interactions in beige, aromatic centres in orange, hydrophobic structures in green. Exclusion spheres are not depicted.

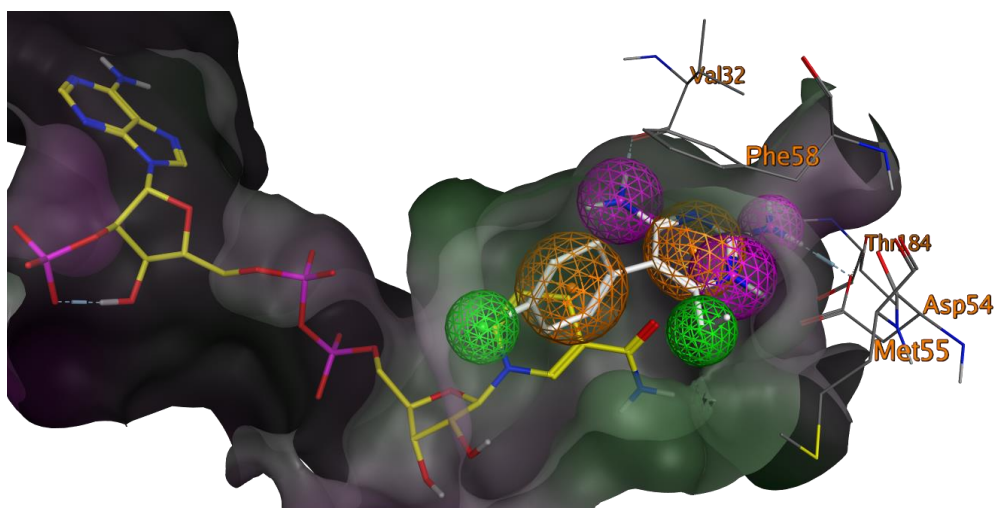

**Figure S12. Complex-based pharmacophore hypothesis based on the *Tb*DHFR binding pocket (ID: „3QFX“).** Carbon atoms of the co-crystallized co-substrate NADPH in yellow, carbon atoms of the co-crystallized inhibitor pyrimethamine in white. The molecular surface is coloured according to lipophilicity with lipophilic areas in green and hydrophilic areas in purple. Potential interactions of the inhibitor are represented by feature spheres: H-bond donors in purple, aromatic centres in orange, hydrophobic structures in green. Exclusion spheres are not depicted.

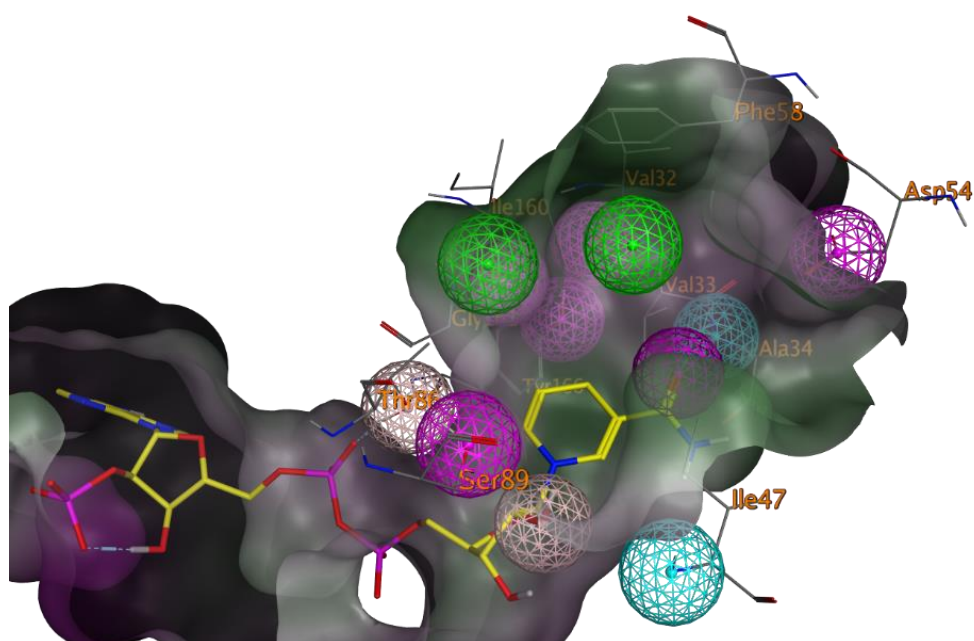

**Figure S13. Target-based pharmacophore hypothesis based on the *Tb*DHFR binding pocket (ID: „3QFX“).** Carbon atoms of the co-crystallized co-substrate NADPH in yellow, the molecular surface is coloured according to lipophilicity with lipophilic areas in green and hydrophilic areas in purple. Potential interactions of amino acids with an inhibitor are represented by projecting feature spheres: H-bond donors in purple, H-bond acceptors in cyan, ionic interactions in beige, aromatic centres in orange, hydrophobic structures in green. Exclusion spheres are not depicted.

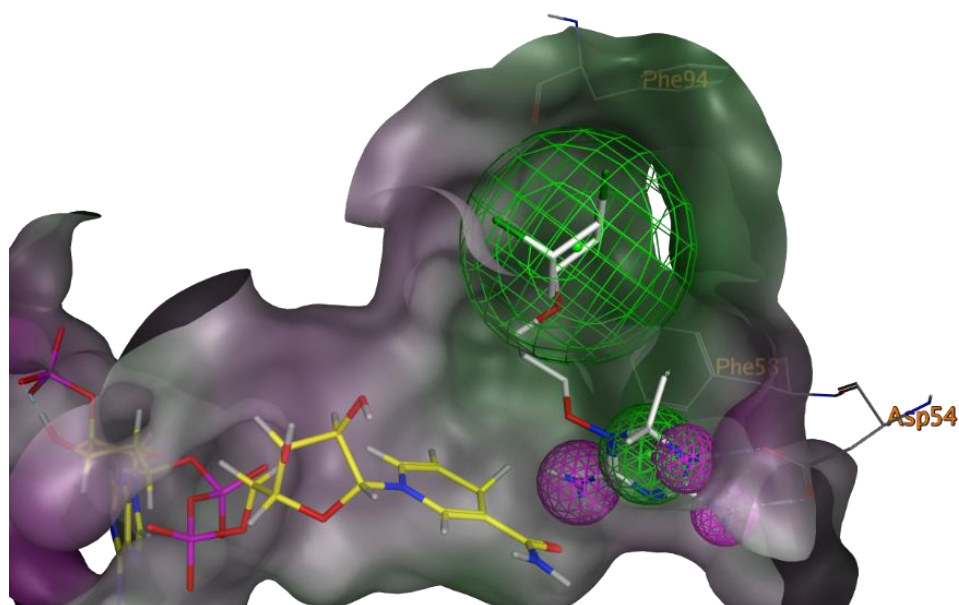

**Figure S14. Complex-based pharmacophore hypothesis based on the *Tb*DHFR binding pocket (ID: „3RG9“).** Carbon atoms of the co-crystallized co-substrate NADPH in yellow, carbon atoms of the co-crystallized inhibitor WR99210 in white. The molecular surface is coloured according to lipophilicity with lipophilic areas in green and hydrophilic areas in purple. Potential interactions of the inhibitor are represented by feature spheres: H-bond donors in purple, hydrophobic structures in green. Exclusion spheres are not depicted.

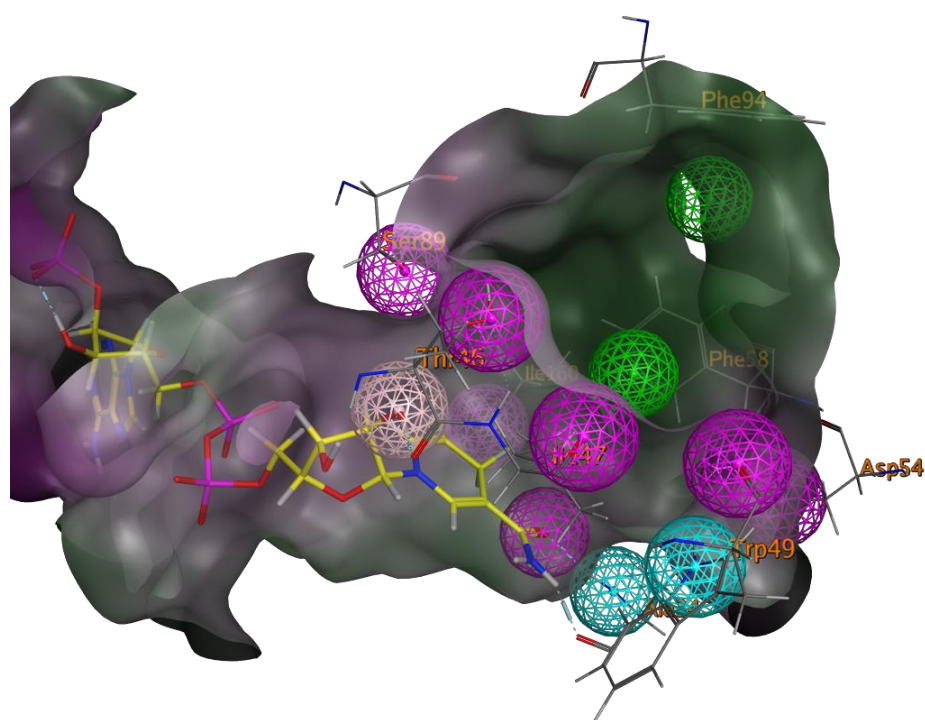

**Figure S15. Target-based pharmacophore hypothesis based on the *Tb*DHFR binding pocket (ID: „3RG9“).** Carbon atoms of the co-crystallized co-substrate NADPH in yellow, the molecular surface is coloured according to lipophilicity with lipophilic areas in green and hydrophilic areas in purple. Potential interactions of amino acids with an inhibitor are represented by projecting feature spheres: H-bond donors in purple, H-bond acceptors in cyan, ionic interactions in beige, aromatic centres in orange, hydrophobic structures in green. Exclusion spheres are not depicted.

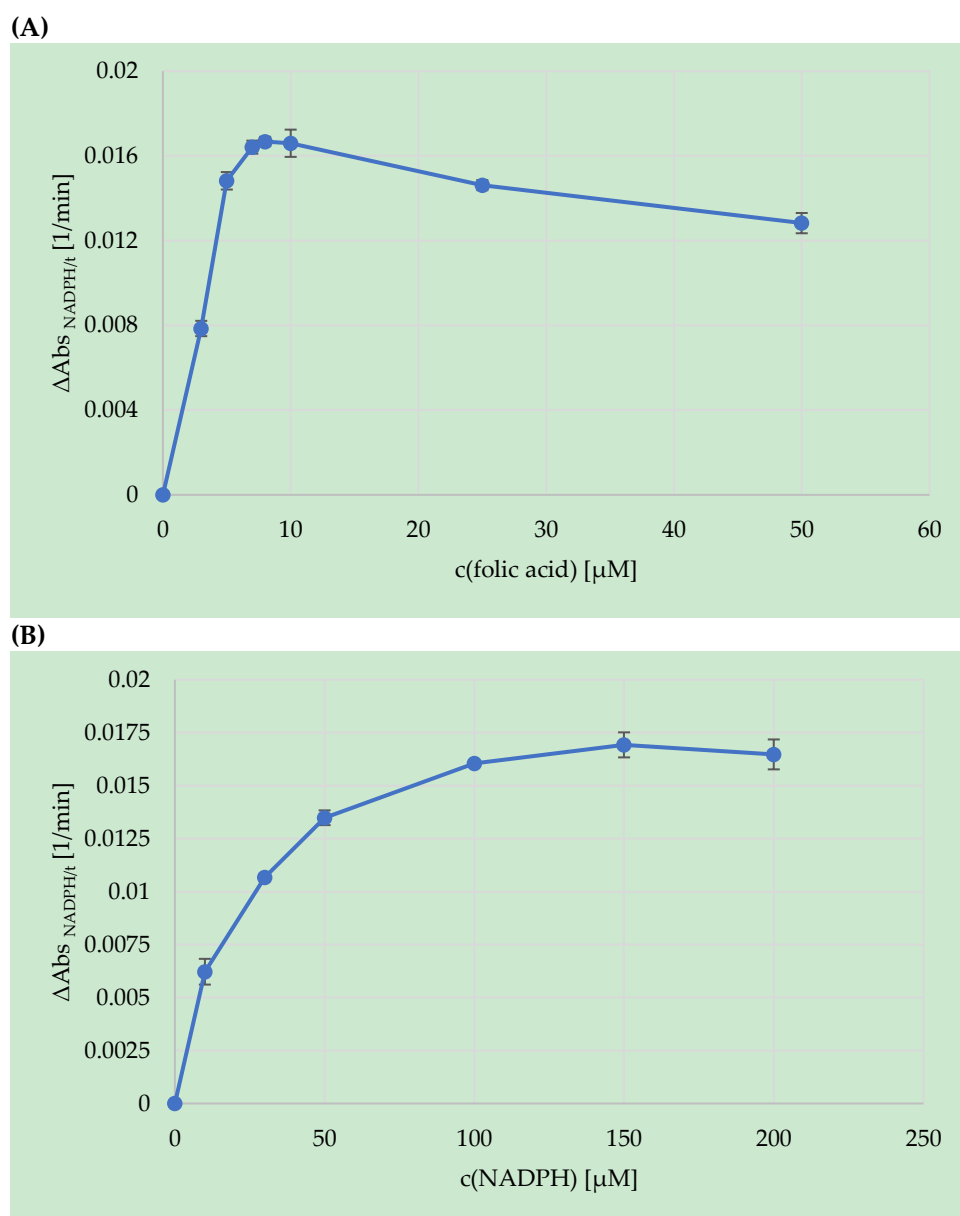

**Figure S16. Experimental determination of the saturating conditions of folic acid and NADPH for *TbPTR1*.** (A) Constant concentration of the co-substrate NADPH (200  $\mu\text{M}$ ) while varying the concentrations of the substrate folic acid (3  $\mu\text{M}$  – 50  $\mu\text{M}$ ). In the concentration range above the saturation (8–10  $\mu\text{M}$ ), substrate inhibition was observed. (B) Constant concentration of the substrate folic acid (8  $\mu\text{M}$ ) while varying the concentrations of the co-substrate NADPH (10  $\mu\text{M}$  – 200  $\mu\text{M}$ ). The determination was carried out according to 4.5., using buffer A (50 mM Tris/HCl (pH 7.6), 250 mM NaCl) at 340 nm and a constant temperature of 30 °C.

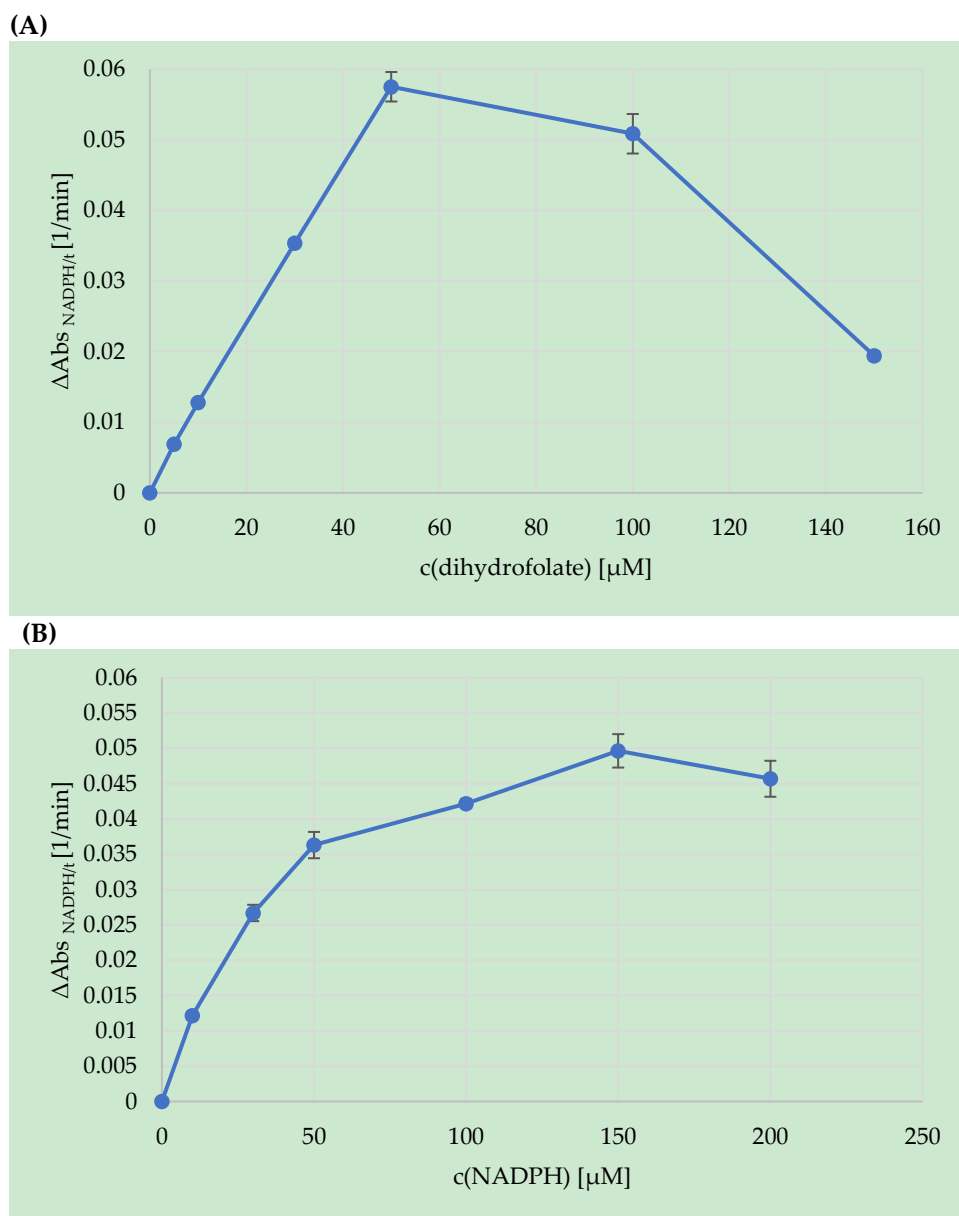

**Figure S17. Experimental determination of the saturating conditions of dihydrofolate (DHF) and NADPH for *TbDHFR*.** (A) Constant concentration of the co-substrate NADPH (200  $\mu\text{M}$ ) while varying the concentrations of the substrate DHF (5  $\mu\text{M}$  – 150  $\mu\text{M}$ ). In the concentration range above saturation (>40  $\mu\text{M}$ ), substrate inhibition was observed. (B) Constant concentration of the substrate DHF (50  $\mu\text{M}$ ) while varying the concentrations of the co-substrate NADPH (10  $\mu\text{M}$  – 200  $\mu\text{M}$ ). The determination was carried out according to 4.6., using buffer B (50 mM Tris/HCl (pH 7.6), 250 mM NaCl, 10 mM BME) at 340 nm and a constant temperature of 30 °C.

**Table S1.** Top hits (compound numbers according to Figure 2 and Figure S1) obtained after complex- and target-based pharmacophore search and docking based on protein structure model 2X9G and its co-crystallized inhibitor pemetrexed. Hits are ranked by their docking scores after induced fit docking.

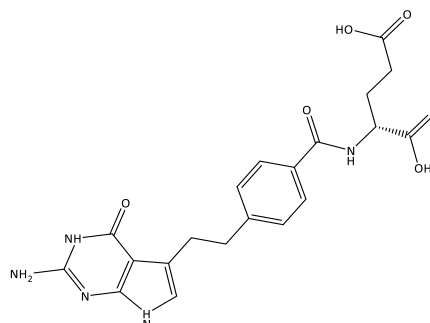

pemetrexed (2X9G)  
-9.79 kcal/mol

| complex-based |                | target-based |                |
|---------------|----------------|--------------|----------------|
| compound      | S              | compound     | S              |
| 8             | -8.16 kcal/mol | 10           | -8.90 kcal/mol |
| 10            | -8.05 kcal/mol | 9            | -8.21 kcal/mol |
| 9             | -7.85 kcal/mol | 14           | -7.65 kcal/mol |
| 14            | -7.55 kcal/mol | 13           | -7.48 kcal/mol |
| 12            | -7.37 kcal/mol | 15           | -7.27 kcal/mol |

**Table S2.** Top hits (compound numbers according to Figure 2 and Figure S1) obtained after complex- and target-based pharmacophore search and docking based on protein structure model 3MCV and its co-crystallized inhibitor PY848. Hits are ranked by their docking scores after induced fit docking.

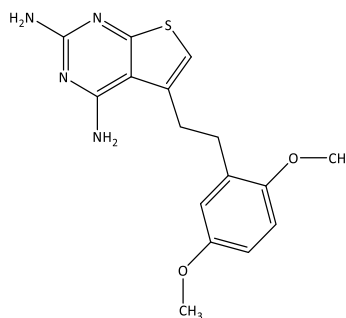

PY848 (3MCV)  
-10.37 kcal/mol

| complex-based |                | target-based |                |
|---------------|----------------|--------------|----------------|
| compound      | S              | compound     | S              |
| 5             | -8.59 kcal/mol | 27           | -7.84 kcal/mol |
| 4             | -8.03 kcal/mol | 14           | -7.76 kcal/mol |
| 16            | -7.91 kcal/mol | 1            | -7.15 kcal/mol |
| 10            | -7.78 kcal/mol | 17           | -7.14 kcal/mol |
| 14            | -7.76 kcal/mol | 31           | -7.05 kcal/mol |

**Table S3.** Top hits (compound numbers according to Figure 2 and Figure S1) obtained after complex- and target-based pharmacophore search and docking based on protein structure model 4CMJ and its co-crystallized inhibitor 6-(4-bromophenyl)-5-phenyl-7H-pyrrolo[2,3 d]pyrimidine-2,4-diamine. Hits are ranked by their docking scores after induced fit docking.

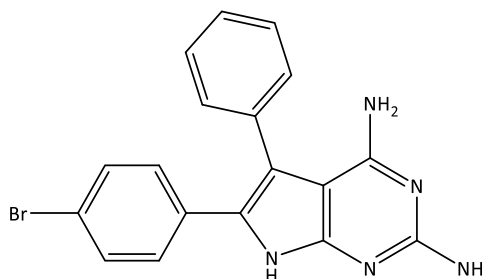

6-(4 bromophenyl)-5-phenyl-7H-pyrrolo[2,3 d]pyrimidine-2,4-diamine (4CMJ)  
-9.51 kcal/mol

| complex-based |                | target-based |                |
|---------------|----------------|--------------|----------------|
| compound      | S              | compound     | S              |
| 10            | -8.90 kcal/mol | 9            | -9.09 kcal/mol |
| 31            | -8.88 kcal/mol | 1            | -8.81 kcal/mol |
| 19            | -8.49 kcal/mol | 31           | -8.52 kcal/mol |
| 7             | -8.31 kcal/mol | 19           | -8.31 kcal/mol |
| 3             | -8.27 kcal/mol | 20           | -8.23 kcal/mol |

**Table S4.** Top hits (compound numbers according to Figure 2 and Figure S1) obtained after complex- and target-based pharmacophore search and docking based on protein structure model 4CMK and its co-crystallized inhibitor 2-amino-5-phenethyl-6-phenyl-3H-pyrrolo[2,3-d]pyrimidine-4(7H)-one. Hits are ranked by their docking scores after induced fit docking.

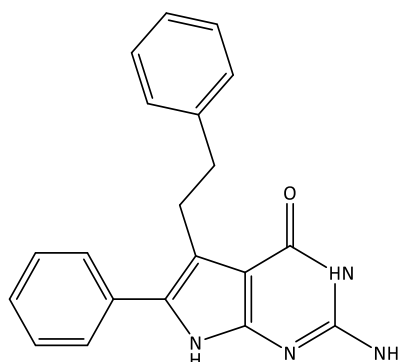

2-amino-5-phenethyl-6-phenyl-3H-pyrrolo[2,3 d]pyrimidine-4(7H)-one (4CMK)  
-8.77 kcal/mol

| complex-based |                | target-based |                |
|---------------|----------------|--------------|----------------|
| compound      | S              | compound     | S              |
| 10            | -9.12 kcal/mol | 11           | -8.63 kcal/mol |
| 9             | -9.01 kcal/mol | 5            | -8.55 kcal/mol |
| 21            | -8.83 kcal/mol | 21           | -8.48 kcal/mol |
| 19            | -8.75 kcal/mol | 7            | -8.32 kcal/mol |
| 5             | -8.65 kcal/mol | 22           | -8.32 kcal/mol |

**Table S5.** Top hits (compound numbers according to Figure 2 and Figure S1) obtained after complex- and target-based pharmacophore search and docking based on protein structure model 5JDI and its co-crystallized inhibitor 3,6-dihydroxy-2-(3-hydroxyphenyl)-4H-1-benzopyran-4-one. Hits are ranked by their docking scores after induced fit docking.

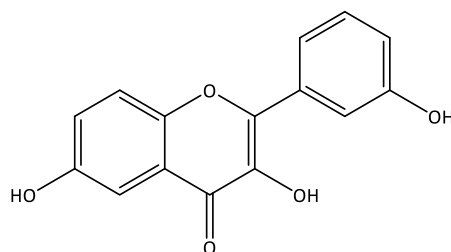

3,6-dihydroxy-2-(3-hydroxyphenyl)-4H-1-benzopyran-4-one (5JDI)  
-7.65 kcal/mol

| complex-based |                | target-based |                |
|---------------|----------------|--------------|----------------|
| compound      | S              | compound     | S              |
| 3             | -8.95 kcal/mol | 7            | -9.39 kcal/mol |
| 23            | -8.73 kcal/mol | 11           | -8.99 kcal/mol |
| 19            | -8.65 kcal/mol | 25           | -8.56 kcal/mol |
| 26            | -8.60 kcal/mol | 16           | -8.53 kcal/mol |
| 22            | -8.50 kcal/mol | 31           | -8.33 kcal/mol |

**Table S6.** Top hits (compound numbers according to Figure 2 and Figure S1) obtained after complex- and target-based pharmacophore search and docking based on protein structure model 3QFX and its co-crystallized inhibitor pyrimethamine. Hits are ranked by their docking scores after induced fit docking.

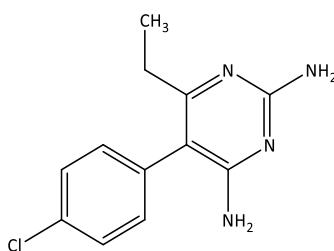

pyrimethamine (3QFX)  
-8.26 kcal/mol

| complex-based |                | target-based |                |
|---------------|----------------|--------------|----------------|
| compound      | S              | compound     | S              |
| 5             | -8.81 kcal/mol | 4            | -8.44 kcal/mol |
| 8             | -8.42 kcal/mol | 24           | -8.07 kcal/mol |
| 4             | -8.32 kcal/mol | 27           | -7.83 kcal/mol |
| 10            | -8.32 kcal/mol | 28           | -7.81 kcal/mol |
| 24            | -8.09 kcal/mol | 29           | -7.79 kcal/mol |

**Table S7.** Top hits (compound numbers according to Figure 2 and Figure S1) obtained after complex- and target-based pharmacophore search and docking based on protein structure model 3RG9 and its co-crystallized inhibitor WR99210. Hits are ranked by their docking scores after induced fit docking.

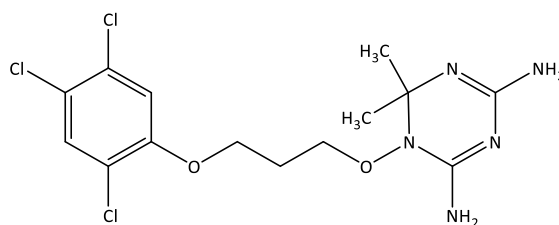

WR99210 (3RG9)  
-8.66 kcal/mol

| complex-based |                | target-based |                |
|---------------|----------------|--------------|----------------|
| compound      | S              | compound     | S              |
| 9             | -9.63 kcal/mol | 18           | -8.46 kcal/mol |
| 10            | -8.81 kcal/mol | 31           | -8.18 kcal/mol |
| 21            | -8.72 kcal/mol | 30           | -8.11 kcal/mol |
| 8             | -8.55 kcal/mol | 6            | -8.09 kcal/mol |
| 31            | -8.21 kcal/mol | 27           | -8.00 kcal/mol |

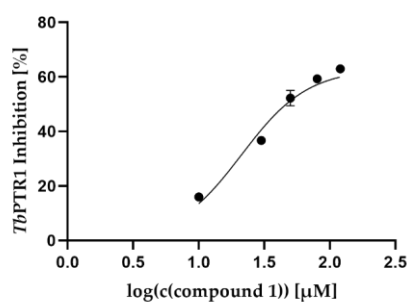

| Best-fit values             |                |
|-----------------------------|----------------|
| Bottom                      | = 0.000        |
| Top                         | = 62.99        |
| LogEC50                     | 1.327          |
| HillSlope                   | 1.721          |
| EC50                        | 21.24          |
| Span                        | = 62.99        |
| 95% CI (profile likelihood) |                |
| LogEC50                     | 1.273 to 1.378 |
| HillSlope                   | 1.474 to 2.020 |
| EC50                        | 18.76 to 23.90 |
| Goodness of Fit             |                |
| Degrees of Freedom          | 13             |
| R squared                   | 0.9716         |
| Sum of Squares              | 127.5          |
| Sy.x                        | 3.132          |
| Constraints                 |                |
| Bottom                      | Bottom = 0     |
| Top                         | Top = 62.986   |
| Number of points            |                |
| # of X values               | 15             |
| # Y values analyzed         | 15             |

**Figure S18.** Determination of the EC<sub>50</sub> value of compound 1 against TbPTR1. The EC<sub>50</sub> value was determined by nonlinear regression analysis using the software GraphPad Prism 8 (Table 1).

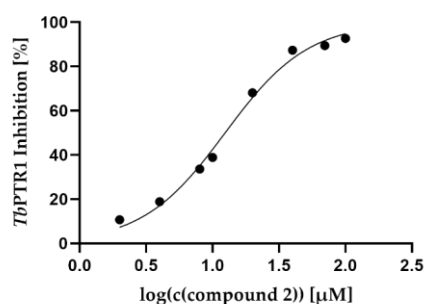

| Best-fit values             |                |
|-----------------------------|----------------|
| Bottom                      | = 0.000        |
| Top                         | = 100.0        |
| LogEC50                     | 1.095          |
| HillSlope                   | 1.390          |
| EC50                        | 12.44          |
| Span                        | = 100.0        |
| 95% CI (profile likelihood) |                |
| LogEC50                     | 1.071 to 1.119 |
| HillSlope                   | 1.288 to 1.504 |
| EC50                        | 11.78 to 13.14 |
| Goodness of Fit             |                |
| Degrees of Freedom          | 22             |
| R squared                   | 0.9919         |
| Sum of Squares              | 191.1          |
| Sy.x                        | 2.947          |
| Constraints                 |                |
| Bottom                      | Bottom = 0     |
| Top                         | Top = 100      |
| Number of points            |                |
| # of X values               | 24             |
| # Y values analyzed         | 24             |

**Figure S19.** Determination of the IC<sub>50</sub> value of compound 2 against *TbPTR1*. The IC<sub>50</sub> value was determined by nonlinear regression analysis using the software GraphPad Prism 8 (Table 1).

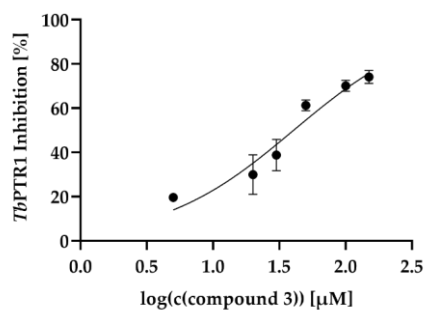

| Best-fit values             |                 |
|-----------------------------|-----------------|
| Bottom                      | = 0.000         |
| Top                         | = 100.0         |
| LogEC50                     | 1.607           |
| HillSlope                   | 0.8690          |
| EC50                        | 40.45           |
| Span                        | = 100.0         |
| 95% CI (profile likelihood) |                 |
| LogEC50                     | 1.527 to 1.685  |
| HillSlope                   | 0.6881 to 1.084 |
| EC50                        | 33.62 to 48.39  |
| Goodness of Fit             |                 |
| Degrees of Freedom          | 16              |
| R squared                   | 0.9126          |
| Sum of Squares              | 697.6           |
| Sy.x                        | 6.603           |
| Constraints                 |                 |
| Bottom                      | Bottom = 0      |
| Top                         | Top = 100       |
| Number of points            |                 |
| # of X values               | 18              |
| # Y values analyzed         | 18              |

**Figure S20.** Determination of the IC<sub>50</sub> value of compound 3 for *TbPTR1*. The IC<sub>50</sub> value was determined by nonlinear regression analysis using the software GraphPad Prism 8 (Table 1).

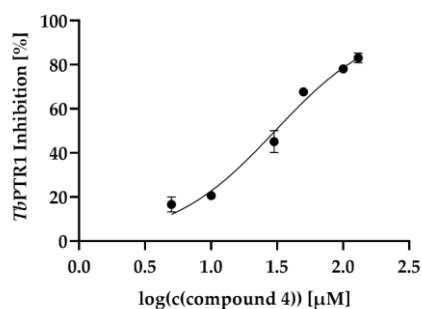

| Best-fit values             |                 |
|-----------------------------|-----------------|
| Bottom                      | = 0.000         |
| Top                         | = 100.0         |
| LogEC50                     | 1.485           |
| HillSlope                   | 1.096           |
| EC50                        | 30.54           |
| Span                        | = 100.0         |
| 95% CI (profile likelihood) |                 |
| LogEC50                     | 1.438 to 1.531  |
| HillSlope                   | 0.9707 to 1.238 |
| EC50                        | 27.41 to 33.93  |
| Goodness of Fit             |                 |
| Degrees of Freedom          | 16              |
| R squared                   | 0.9771          |
| Sum of Squares              | 289.8           |
| Sy.x                        | 4.256           |
| Constraints                 |                 |
| Bottom                      | Bottom = 0      |
| Top                         | Top = 100       |
| Number of points            |                 |
| # of X values               | 18              |
| # Y values analyzed         | 18              |

**Figure S21.** Determination of the IC<sub>50</sub> value of compound **4** for *TbPTR1*. The IC<sub>50</sub> value was determined by nonlinear regression analysis using the software GraphPad Prism 8 (Table 1).

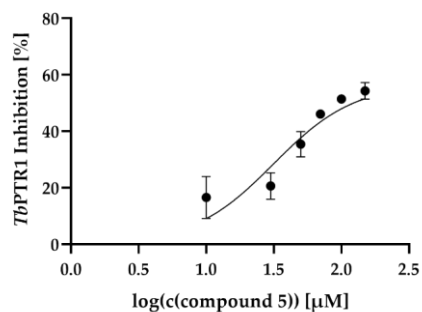

| Best-fit values             |                |
|-----------------------------|----------------|
| Bottom                      | = 0.000        |
| Top                         | = 56.92        |
| LogEC50                     | 1.499          |
| HillSlope                   | 1.452          |
| EC50                        | 31.52          |
| Span                        | = 56.92        |
| 95% CI (profile likelihood) |                |
| LogEC50                     | 1.367 to 1.606 |
| HillSlope                   | 1.008 to 2.236 |
| EC50                        | 23.27 to 40.33 |
| Goodness of Fit             |                |
| Degrees of Freedom          | 16             |
| R squared                   | 0.8468         |
| Sum of Squares              | 620.5          |
| Sy.x                        | 6.227          |
| Constraints                 |                |
| Bottom                      | Bottom = 0     |
| Top                         | Top = 56.92    |
| Number of points            |                |
| # of X values               | 18             |
| # Y values analyzed         | 18             |

**Figure S22.** Determination of the EC<sub>50</sub> value of compound **5** for *TbPTR1*. The EC<sub>50</sub> value was determined by nonlinear regression analysis using the software GraphPad Prism 8 (Table 1).

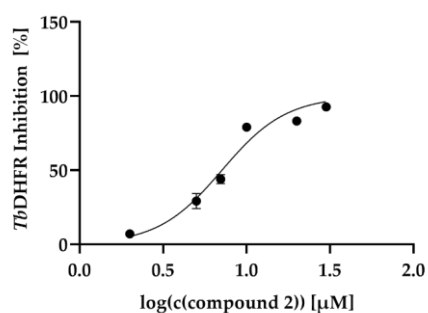

| Best-fit values             |                  |
|-----------------------------|------------------|
| Bottom                      | = 0.000          |
| Top                         | = 100.0          |
| LogEC50                     | 0.8527           |
| HillSlope                   | 2.259            |
| EC50                        | 7.124            |
| Span                        | = 100.0          |
| 95% CI (profile likelihood) |                  |
| LogEC50                     | 0.8122 to 0.8931 |
| HillSlope                   | 1.733 to 3.120   |
| EC50                        | 6.489 to 7.818   |
| Goodness of Fit             |                  |
| Degrees of Freedom          | 16               |
| R squared                   | 0.9565           |
| Sum of Squares              | 771.9            |
| Sy.x                        | 6.946            |
| Constraints                 |                  |
| Bottom                      | Bottom = 0       |
| Top                         | Top = 100        |
| Number of points            |                  |
| # of X values               | 18               |
| # Y values analyzed         | 18               |

**Figure S23.** Determination of the IC<sub>50</sub> value of compound 2 for *TbDHFR*. The IC<sub>50</sub> value was determined by nonlinear regression analysis using the software GraphPad Prism 8 (Table 1).

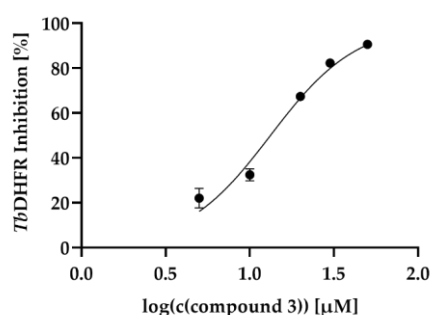

| Best-fit values             |                |
|-----------------------------|----------------|
| Bottom                      | = 0.000        |
| Top                         | = 100.0        |
| LogEC50                     | 1.123          |
| HillSlope                   | 1.691          |
| EC50                        | 13.27          |
| Span                        | = 100.0        |
| 95% CI (profile likelihood) |                |
| LogEC50                     | 1.083 to 1.161 |
| HillSlope                   | 1.457 to 1.964 |
| EC50                        | 12.11 to 14.50 |
| Goodness of Fit             |                |
| Degrees of Freedom          | 13             |
| R squared                   | 0.9745         |
| Sum of Squares              | 283.3          |
| Sy.x                        | 4.668          |
| Constraints                 |                |
| Bottom                      | Bottom = 0     |
| Top                         | Top = 100      |
| Number of points            |                |
| # of X values               | 15             |
| # Y values analyzed         | 15             |

**Figure S24.** Determination of the IC<sub>50</sub> value of compound 3 for *TbDHFR*. The IC<sub>50</sub> value was determined by nonlinear regression analysis using the software GraphPad Prism 8 (Table 1).
